# Supplementary material
Source: PubMed Central journal article supplement (PMC8204259)
Supplement: jamaneurol-e211681-s001.pdf [file jamaneurol-e211681-s001.pdf]

## Supplementary Online Content

Kundishora AJ, Peters ST, Pinard A, et al. *DIAPH1* variants in non–East Asian patients with sporadic moyamoya disease. *JAMA Neurol*. Published online June 14, 2021. doi:10.1001/jamaneurol.2021.1681

**eFigure 1.** Sanger Validation of Identified *DIAPH1* Variants

**eFigure 2.** De Novo Variant Rate Closely Approximates Poisson Distribution in Primary MMD Cases and Controls

**eFigure 3.** Phylogenetic Conservation and Structural Implication of De Novo and Rare, Damaging Transmitted *DIAPH1* Variants in Moyamoya Disease

**eFigure 4.** kNN-DREMI *Diaph1*-Associated Genes and KEGG Terms

**eTable 1.** High Confidence, Monogenic Causes of Primary MMD and Syndromes With Associated MM Pathology

**eTable 2.** Number of Studied Cases From Yale, UT Health, and Simons Simplex Collection (SSC)

**eTable 3.** Phenotypes for Primary Probands

**eTable 4.** Summary Sequencing Statistics for the Primary MMD and Control Cohorts

**eTable 5.** De Novo Variants in 22 Primary MMD Trios

**eTable 6.** Demographic Characteristics of Primary MMD Cases and Controls

**eTable 7.** Sequencing Metrics for All Reported Samples

**eTable 8.** Rare Transmitted/Unphased Variants in Known MMD Genes

**eTable 9.** De Novo Variant Enrichment Analysis for Each Functional Class in 22 Primary Moyamoya Case Trios

**eTable 10.** Damaging Recessive Variants in 26 MMD Cases

**eMethods.** Detailed Methods

### eReferences

This supplementary material has been provided by the authors to give readers additional information about their work.

**eFigure 1. Sanger Validation Of Identified *DIAPH1* Variants**

**eFigure 1.**

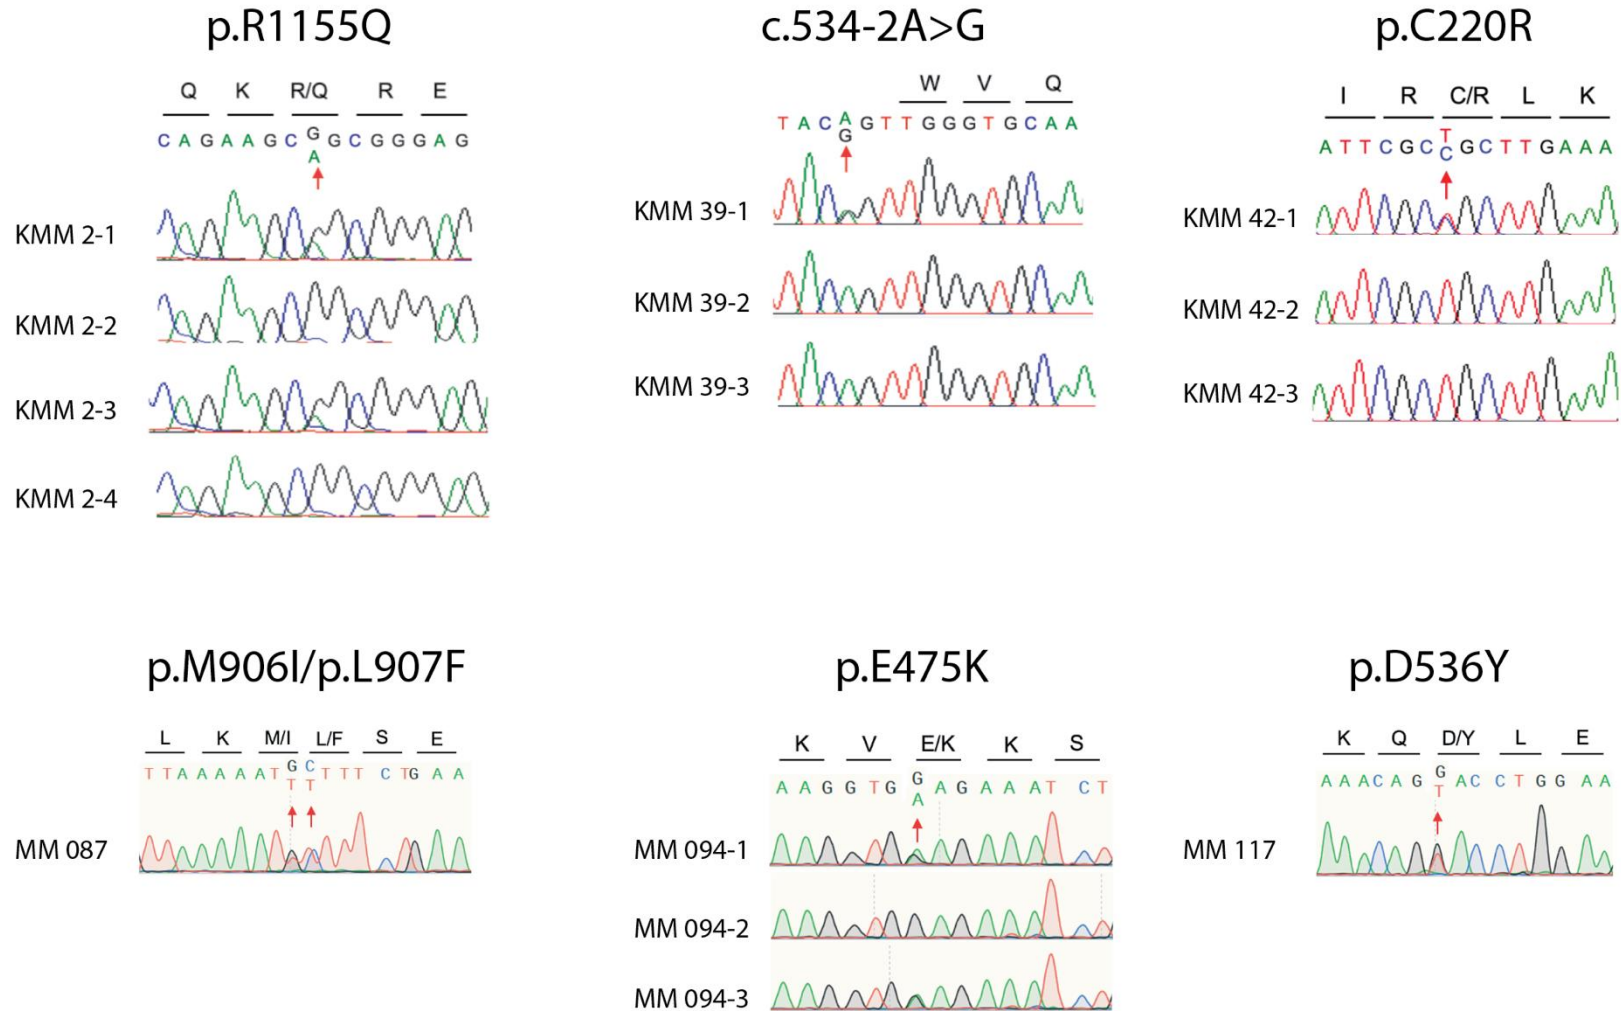

**eFigure 2. De novo variant rate closely approximates Poisson distribution in primary MMD cases and controls.**

Observed number of *de novo* mutations per subject (bars) compared to the numbers expected (line) from the Poisson distribution in the case (red) and control (blue) cohorts. 'p' denotes chi-squared p-value.

**eFigure 2**

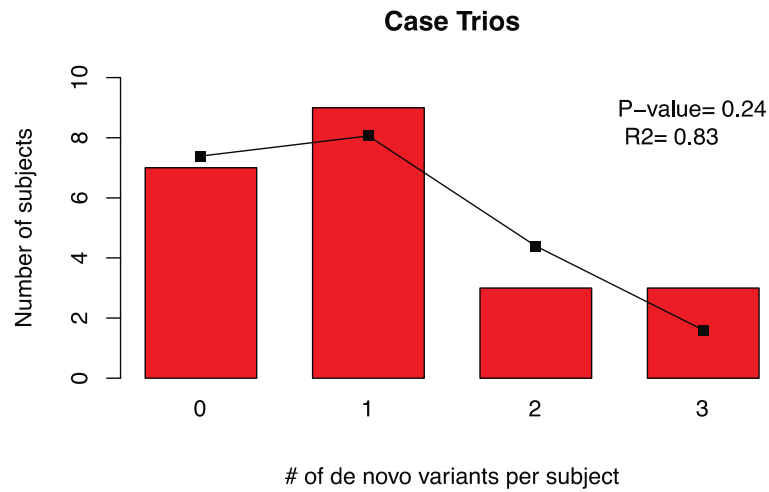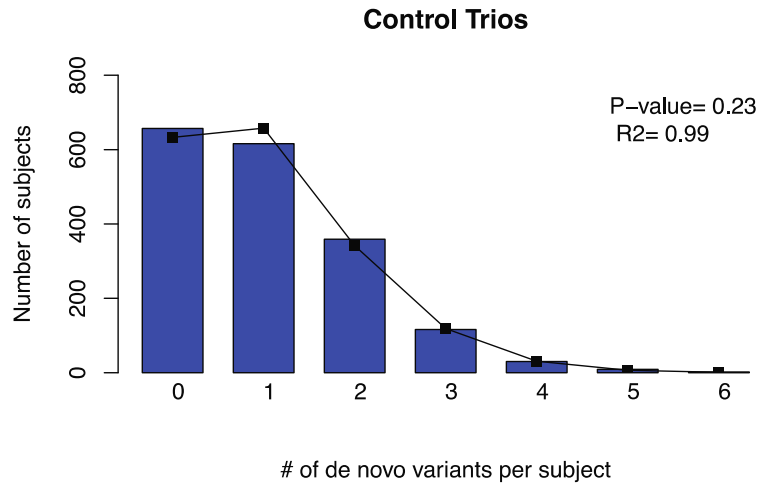

### eFigure 3. Phylogenetic conservation and structural implication of De novo and rare, damaging transmitted DIAPH1 variants in moyamoya disease.

(A) Phylogenetic conservation of amino acid residues in mDia1 mutated in moyamoya disease. The wild-type amino acid is shown, with the mutated amino acid highlighted in yellow. (B) Impact of moyamoya disease-associated missense mutations on mDia1 protein structure. The red discs represent the extent of the structural clashes. C220 is positioned in the DID domain. The Cys side chain is surrounded by hydrophobic residues (L165, L168, L172, L191, I217, L221, A223 and F224), which are sequestered within a tightly packed four-helical bundle. A large, bulky, polar, guanidinium side chain of Arg at this position will not fit within the tightly packed hydrophobic region and is predicted to disrupt the tight helical packing. The  $\Delta\Delta G$  value for C220R mutation was predicted to be 2.68. E475 is located in a coiled coil region between FH3-Dimerization domain and FH1 domains. The side chain in the structure is solvent exposed and contributes to a negatively charged region. A mutation to a positive charged lysyl side chain alters the charge environment around the region. The  $\Delta\Delta G$  value for E475K was predicted to be 0.78. M906 is present in the FH2 domain and is surrounded by hydrophobic residues. A mutation to the branched side chain of Ile results in side chain steric clashes with the other side chains of hydrophobic residues like L907 and V951. The  $\Delta\Delta G$  value for M906I mutation was predicted to be 0.17. The side chain of L907 is surrounded in a tight hydrophobic environment by short side chains of L925, L901, and V851. A mutation to a bulky phenylalanine, will make steric clashes with V851 and also the side chain of V921. The  $\Delta\Delta G$  value for L907F mutation was predicted to be 2.47. R1155 is a part of the R1155-E1025-R1156 triad, present in the FH2 domain. The guanidinium side chain of R1155 forms a salt bridge with E1025. In addition, R1155 makes hydrogen bond interactions with N1152. These interactions tether  $\alpha$ -helices in the FH2 domains together. A mutation to a shorter Gln side chain disrupts the hydrogen bond network and also destabilizing the secondary structure in the region. The  $\Delta\Delta G$  value for R1155Q mutation was predicted to be 1.97. See eMethods for further details on predicting protein structure.

eFigure 3.

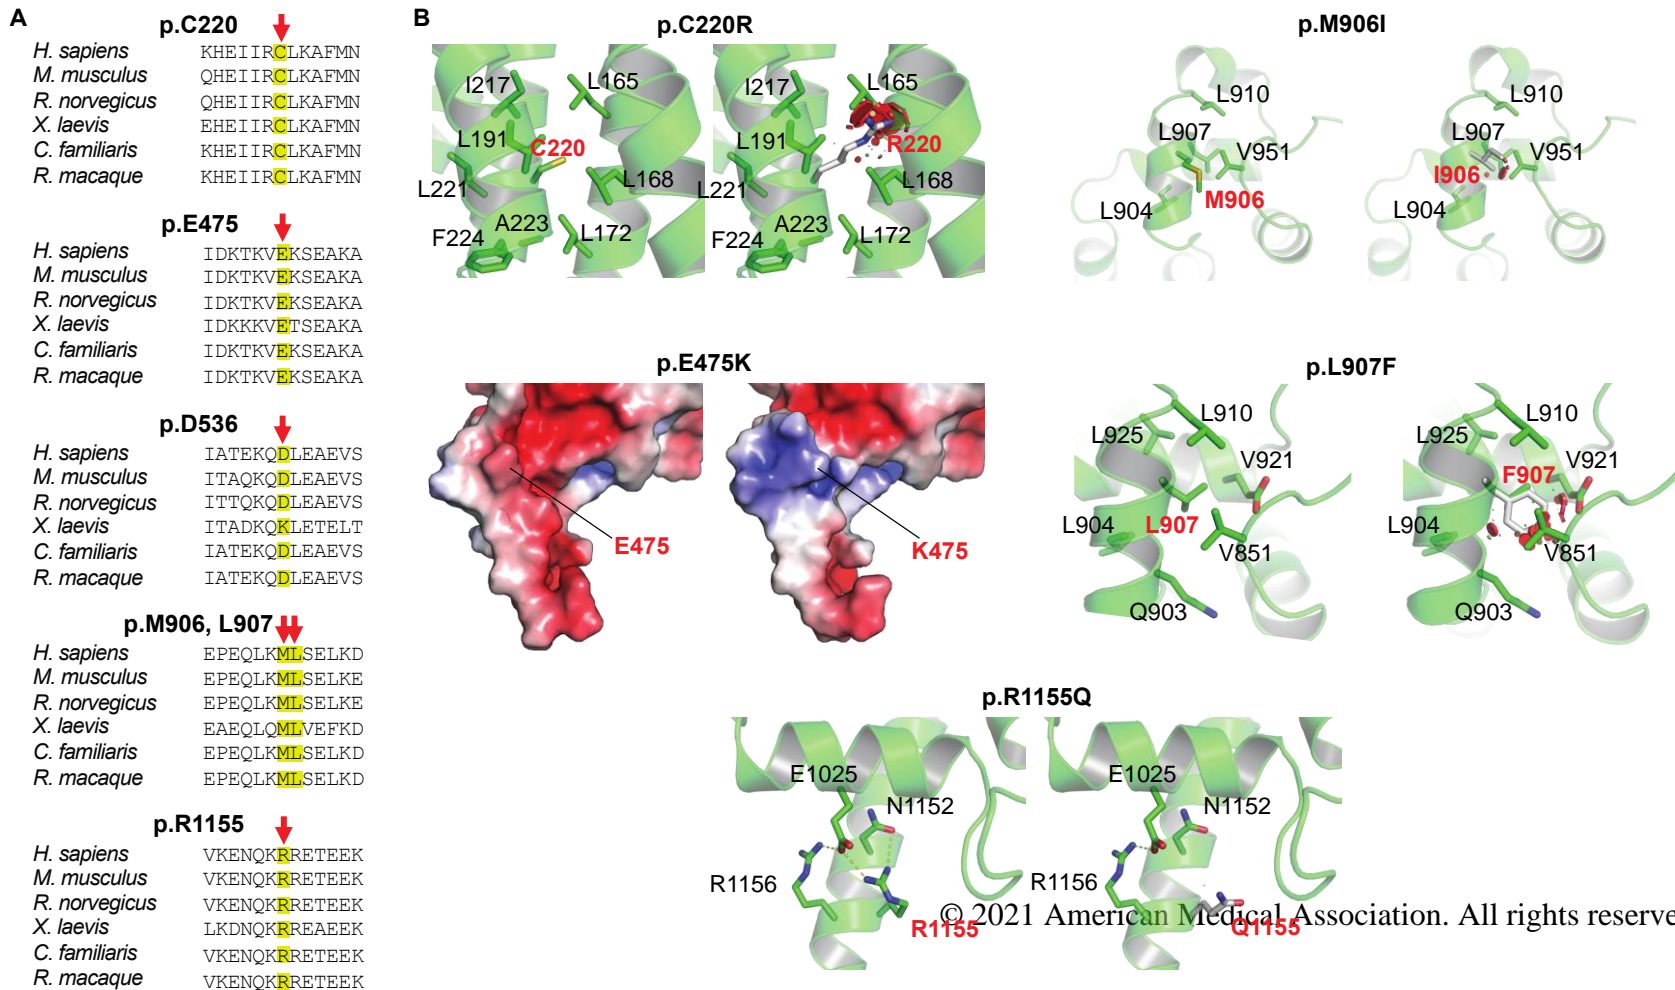

**eFigure 4. kNN-DREMI Diaph1-associated genes and KEGG terms.** (A) Heatmap of kNN-DREMI Diaph1-associated genes from Betsholtz scRNAseq data of mouse brain vascular cells. kNN-DREMI was used to find Diaph1-associated genes as described in the Methods. The top 98th percentile of genes associated with Diaph1 expression is shown in a random subset of 400 single-cells. (B) Top 10 KEGG terms after genes positively associated with Diaph1 DREMI were enriched, using MsigDB.

**eFigure 4**

**A**

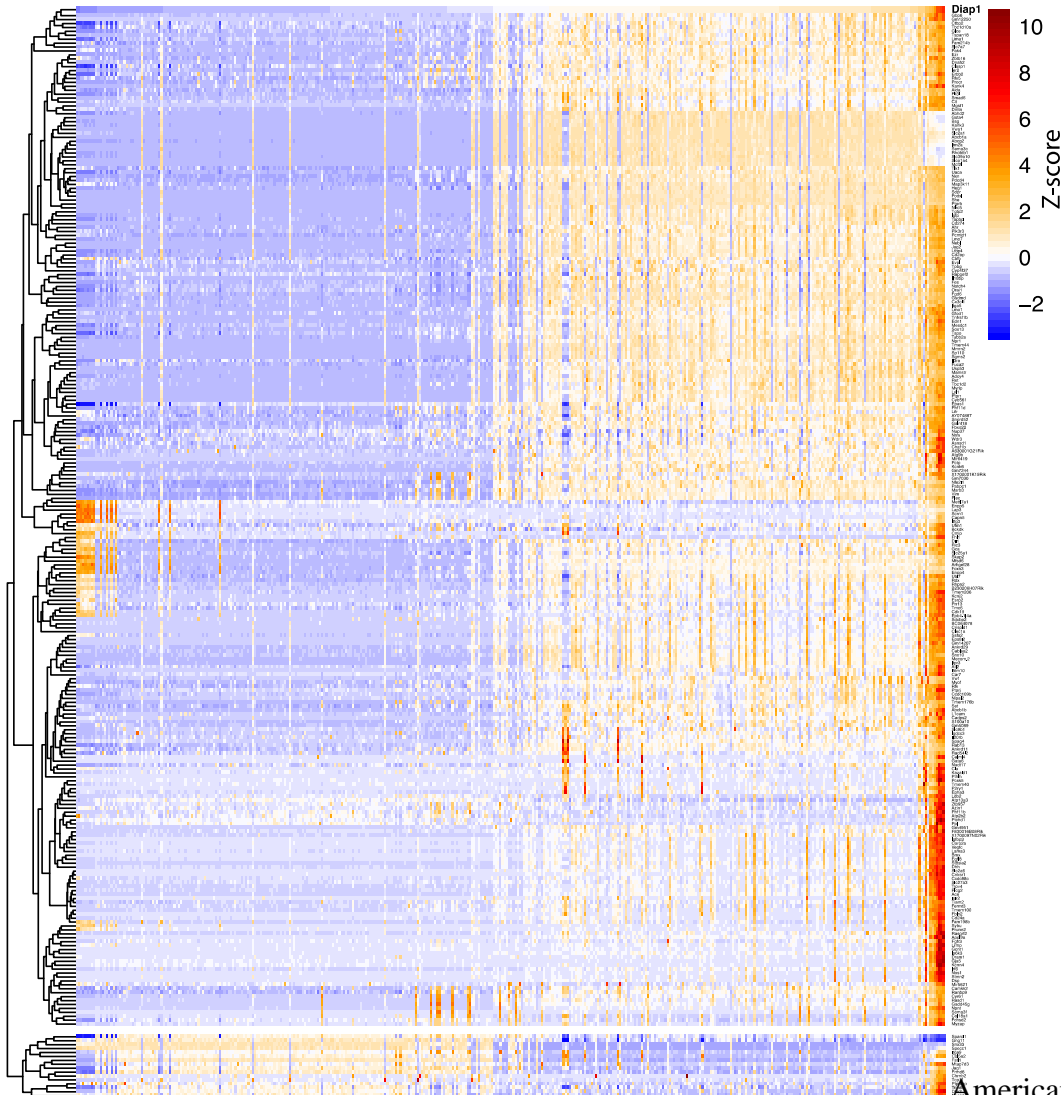

**eTable 1a. High confidence, monogenic causes of primary MMD**

| Gene*                     | OMIM # | Type                       | Variant(s)*                     | Variant type             | Associated features                                                                                                                                 | Population of discovery | Reference                     | PMID                     |                          |
|---------------------------|--------|----------------------------|---------------------------------|--------------------------|-----------------------------------------------------------------------------------------------------------------------------------------------------|-------------------------|-------------------------------|--------------------------|--------------------------|
| RNF213                    | 613378 | Common variant risk factor | c.14576G>A (p.Arg4859Lys)       | snv                      | isolated MMD                                                                                                                                        | East Asian              | Kamada F <i>et al.</i>        | <a href="#">21048783</a> |                          |
|                           |        |                            | c.14429G>A (p.Arg4810Lys)       | snv                      |                                                                                                                                                     |                         | Liu W <i>et al.</i>           | <a href="#">22688066</a> |                          |
|                           |        |                            | c.12037G>A (p.Asp4013Asn)       | snv                      |                                                                                                                                                     |                         | East Asian/ Western European  |                          | Liu W <i>et al.</i>      |
|                           |        |                            | c.12553A>G (p.Lys4185Glu)       | snv                      |                                                                                                                                                     | Western European        | Gagunashvili AN <i>et al.</i> | <a href="#">31645973</a> |                          |
|                           |        |                            | c.12343_12345del (p.Lys4115del) | deletion                 |                                                                                                                                                     |                         | Cecchi AC <i>et al.</i>       | <a href="#">25278557</a> |                          |
|                           |        |                            | c.12059G>T (p.Cys4020Phe)       | snv                      |                                                                                                                                                     |                         | <a href="#">OMIM Evidence</a> | n/a                      |                          |
|                           |        |                            | c.12360C>G (p.Phe4120Leu)       | snv                      |                                                                                                                                                     |                         | Mixed population              | Pinard A <i>et al.</i>   | <a href="#">31474762</a> |
| c.12040C>A (p.His4014Asn) | snv    | Mixed population           | Guey S <i>et al.</i>            | <a href="#">28635853</a> |                                                                                                                                                     |                         |                               |                          |                          |
| GUCY1A1                   | 615750 | rare large effect          | c.1086+1G>A                     | snv                      | achalasia                                                                                                                                           | Algerian                | Herve D <i>et al.</i>         | <a href="#">24581742</a> |                          |
|                           |        |                            | c.1045C>T (p.Arg349Ter)         | snv                      |                                                                                                                                                     |                         |                               |                          |                          |
|                           |        |                            | c.1170del (p.Glu391fs)          | snv                      |                                                                                                                                                     |                         |                               |                          |                          |
|                           |        |                            | c.1258C>T (p.Arg420Ter)         | snv                      |                                                                                                                                                     | Western European        | Wallace S <i>et al.</i>       | <a href="#">26777256</a> |                          |
|                           |        |                            | c.1954G>T (p.Gly652Ter)         | snv                      |                                                                                                                                                     |                         |                               |                          |                          |
|                           |        |                            | c.1550G>A (p.Cys517Tyr)         | snv                      |                                                                                                                                                     |                         |                               |                          |                          |
| c.334_335del (p.Glu112fs) | snv    | isolated MMD               |                                 |                          |                                                                                                                                                     |                         |                               |                          |                          |
| BRCC3*                    | 300617 | rare large effect          | deletion on Xq28                | deletion                 | Short stature, hypergonadotropic hypogonadism, hypertension, facial dysmorphism, dilated cardiomyopathy, premature grey hair, early-onset cataracts | North African           | Miskinyte S <i>et al.</i>     | <a href="#">21596366</a> |                          |
| MTCP1*                    | 300116 |                            |                                 |                          |                                                                                                                                                     |                         |                               |                          |                          |

**eTable 1b. High confidence, monogenic causes of syndromes with associated MM pathology**

| Gene          | OMIM # | Type                       | Variant(s)*              | Variant type | Syndrome                                                   | Population of discovery | Reference                | PMID                     |
|---------------|--------|----------------------------|--------------------------|--------------|------------------------------------------------------------|-------------------------|--------------------------|--------------------------|
| <i>RNF213</i> | 613378 | Common variant risk factor | c.6169G>A (p.Asp2057Asn) | snv          | Midaortic Syndrome                                         | Mixed population        | Warejko JK <i>et al.</i> | <a href="#">29483232</a> |
| <i>ACTA2</i>  | 614042 | rare large effect          | c.773G>A (p.Arg258His)   | snv          | Smooth muscle dysfunction syndrome                         | Western European        | Guo D <i>et al.</i>      | <a href="#">17994018</a> |
|               |        |                            | c.772C>T (p.Arg258Cys)   | snv          |                                                            |                         | Milewicz <i>et al.</i>   | <a href="#">20734336</a> |
|               |        |                            | c.536G>A (p.Arg179His)   | snv          |                                                            |                         |                          |                          |
| <i>PCNT</i>   | 210720 | rare large effect          | c.844dup (p.Arg281fs)    | duplication  | microcephalic osteodysplastic primordial dwarfism, type II | Eastern European        | Rauch A <i>et al.</i>    | <a href="#">18174396</a> |
|               |        |                            | PCNT, 486-BP DEL, NT84   | deletion     |                                                            | Middle Eastern          | Rauch A <i>et al.</i>    | <a href="#">18174396</a> |
|               |        |                            | c.3109G>T (p.Glu1037Ter) | snv          |                                                            | Eastern European        | Willems M <i>et al.</i>  | <a href="#">19643772</a> |
| <i>YY1AP1</i> | 607860 | rare large effect          | c.724C>T (p.Gln242Ter)   | snv          | Grange syndrome                                            | Western European        | Guo D, <i>et al.</i>     | <a href="#">27939641</a> |

\* reported genes and variants include those with high quality evidence reported in OMIM and determined likely pathogenic in ClinVar

\* BRCC3 and MTCP1 are within the critical overlap region of deletion on Xq28 which is responsible for MMD 4

**eTable 2. Number of studied cases from Yale, UT Health, and Simons Simplex Collection (SSC)**

| <b>Family Type</b>                                      | <b>Total Number from Yale<br/>(# Trios)</b> | <b>Total Number from UT Health<br/>(# Trios)</b> | <b>Total Number from SSC<br/>(# Trios)</b> |
|---------------------------------------------------------|---------------------------------------------|--------------------------------------------------|--------------------------------------------|
| Singleton                                               | 2                                           | 52                                               | 0                                          |
| Trio (affected proband and parents)                     | 18                                          | 28                                               | 1,798                                      |
| Quad (affected proband,<br>unaffected sibling, parents) | 1 (1)                                       | 0 (0)                                            | 0 (0)                                      |
| Other family structures                                 | 3 (3)                                       | 4 (1)                                            | 0 (0)                                      |
| <b>Total</b>                                            | <b>24 (22)</b>                              | <b>84 (29)</b>                                   | <b>1,798 (1,798)</b>                       |

**eTable 3. Phenotypes for Primary Probands****a. Phenotypes for 24 Primary Moyamoya probands enrolled at Yale**

| <b>Proband ID</b> | <b>Sex</b> | <b>Ethnicity</b> | <b>Family Type</b> |
|-------------------|------------|------------------|--------------------|
| KMM-4-1           | F          | European         | Trio               |
| KMM_50-1          | F          | Mexican          | Trio               |
| KMM_5-1           | M          | European         | Trio               |
| KMM_45-1          | F          | European         | Trio               |



|             |   |                          |           |
|-------------|---|--------------------------|-----------|
| KMM_42-1    | F | European                 | Trio      |
| KMM_41-1    | M | European                 | Trio      |
| KMM_40-1    | M | European                 | Trio      |
| KMM_39-1    | M | European                 | Trio      |
| KMM_36-1    | F | European                 | Trio      |
| KMM_35-1    | M | Mexican                  | Trio      |
| KMM_3-1     | M | Mexican                  | Trio      |
| KMM_28-1    | F | African American/African | Trio      |
| KMM_27-1    | F | European                 | Trio      |
| KMM_23-1    | M | Mexican                  | Trio      |
| KMM_21-1    | F | European                 | Trio      |
| KMM_2-1     | M | European                 | Trio      |
| KMM_19-1    | M | European                 | Trio      |
| KMM_16-1    | F | European                 | Trio      |
| KMM_14-1    | M | European                 | Trio      |
| KMM_13-3    | M | East Asian               | Trio      |
| KMM_11-1    | M | European                 | Trio      |
| CHO_0001-01 | M | European                 | Trio      |
| KMM_22-1    | F | European                 | Singleton |
| KMM_29-1    | M | European                 | Singleton |

---

**b. Phenotypes for 84 Primary moyamoya probands enrolled at UTHealth**

| Proband ID | Sex | Ethnicity | Family Type |
|------------|-----|-----------|-------------|
| MM005      | F   | European  | Trio        |
| MM010      | F   | Other     | Trio        |
| MM048      | F   | European  | Trio        |
| MM050      | F   | European  | Trio        |
| MM052      | M   | Mexican   | Trio        |
| MM055      | F   | European  | Trio        |
| MM071      | F   | European  | Trio        |
| MM072      | F   | European  | Trio        |
| MM075      | F   | European  | Trio        |
| MM092      | F   | European  | Trio        |
| MM094      | M   | European  | Trio        |
| MM123      | M   | European  | Trio        |
| MM131      | M   | European  | Trio        |
| MM150      | M   | European  | Trio        |
| MM151      | F   | Other     | Trio        |
| MM152      | M   | European  | Trio        |
| MM153      | F   | European  | Trio        |
| MM154      | M   | European  | Trio        |
| MM156      | M   | European  | Trio        |
| MM158      | F   | European  | Trio        |
| MM159      | F   | European  | Trio        |
| MM162      | M   | European  | Trio        |
| MM165      | F   | European  | Trio        |
| MM166      | F   | European  | Trio        |
| MM169      | M   | European  | Trio        |
| MM170      | M   | European  | Trio        |
| MM173      | F   | European  | Trio        |

|       |   |            |           |
|-------|---|------------|-----------|
| MM185 | M | European   | Trio      |
| MM013 | F | Other      | Trio      |
| MM015 | F | European   | Singleton |
| MM035 | M | European   | Singleton |
| MM112 | F | European   | Singleton |
| MM125 | M | European   | Singleton |
| MM139 | F | Mexican    | Singleton |
| MM163 | F | European   | Singleton |
| MM001 | F | European   | Singleton |
| MM130 | M | European   | Singleton |
| MM137 | F | European   | Singleton |
| MM003 | F | East Asian | Singleton |
| MM006 | M | European   | Singleton |
| MM007 | F | Other      | Singleton |
| MM009 | F | Other      | Singleton |
| MM011 | F | European   | Singleton |
| MM012 | F | European   | Singleton |
| MM023 | F | European   | Singleton |
| MM026 | F | European   | Singleton |
| MM028 | F | European   | Singleton |
| MM029 | M | European   | Singleton |
| MM030 | F | European   | Singleton |
| MM039 | F | European   | Singleton |
| MM041 | M | European   | Singleton |
| MM042 | F | European   | Singleton |
| MM051 | F | European   | Singleton |
| MM060 | F | European   | Singleton |
| MM061 | M | Mexican    | Singleton |
| MM078 | M | European   | Singleton |

|       |   |                          |           |
|-------|---|--------------------------|-----------|
| MM083 | F | European                 | Singleton |
| MM087 | F | African American/African | Singleton |
| MM093 | F | African American/African | Singleton |
| MM095 | F | European                 | Singleton |
| MM097 | F | European                 | Singleton |
| MM098 | F | European                 | Singleton |
| MM100 | F | European                 | Singleton |
| MM101 | F | European                 | Singleton |
| MM102 | F | European                 | Singleton |
| MM106 | F | European                 | Singleton |
| MM108 | F | European                 | Singleton |
| MM109 | F | African American/African | Singleton |
| MM110 | F | African American/African | Singleton |
| MM117 | F | African American/African | Singleton |
| MM120 | F | European                 | Singleton |
| MM124 | F | European                 | Singleton |
| MM128 | M | South Asian              | Singleton |
| MM133 | F | East Asian               | Singleton |
| MM135 | F | South Asian              | Singleton |
| MM138 | F | European                 | Singleton |
| MM140 | F | European                 | Singleton |
| MM160 | F | European                 | Singleton |
| MM161 | F | East Asian               | Singleton |
| MM172 | F | European                 | Singleton |
| MM175 | F | Other                    | Singleton |
| MM184 | F | European                 | Singleton |
| MM190 | M | European                 | Singleton |
| MM191 | F | European                 | Singleton |

---

**eTable 4. Summary sequencing statistics for the primary MMD and control cohorts**

| Category                                  | Cases<br>(NimbleGen V2; N=3) | Cases<br>(MedExome; N=9) | Cases<br>(xGen IDT; N=56) <sup>&amp;</sup> | Controls<br>(Roche V2; N=5,394) |
|-------------------------------------------|------------------------------|--------------------------|--------------------------------------------|---------------------------------|
| Read length (bp)                          | 76                           | 76-101                   | 101                                        | 50-99                           |
| # of reads per sample (M)                 | 73.7                         | 60.8                     | 78.1                                       | 111.5                           |
| Median coverage at each targeted base (X) | 61.7                         | 37.3                     | 85.1                                       | 68                              |
| Mean coverage at each targeted base (X)   | 72.7                         | 43.7                     | 90.4                                       | 80.8                            |
| % of all reads that map to target         | 62.30%                       | 45.90%                   | 58.80%                                     | 46.50%                          |
| % of all bases that map to target         | 46.70%                       | 37.10%                   | 44.10%                                     | 35.70%                          |
| % of targeted bases read at least 8x      | 93.70%                       | 96.10%                   | 98.30%                                     | 92.70%                          |
| % of targeted bases read at least 10x     | 92.40%                       | 94.80%                   | 98.10%                                     | 91.40%                          |
| % of targeted bases read at least 15x     | 89.70%                       | 89.70%                   | 97.40%                                     | 87.80%                          |
| % Mean error rate                         | 0.40%                        | 0.30%                    | 0.20%                                      | 0.50%                           |

**eTable 5. De novo variants in 22 primary MMD trios**

| ID       | CHROM | POS       | REF | ALT | Gene     | AA change  | Variant_Class       | MetaSVM_pred | CADD v1.6 | ExAC_ALL | Bravo    | gnomAD_exome_ALL | gnomAD_genome_ALL | pLI score (gnomAD v2.1.1) | mis_z (gnomAD v2.1.1) |
|----------|-------|-----------|-----|-----|----------|------------|---------------------|--------------|-----------|----------|----------|------------------|-------------------|---------------------------|-----------------------|
| KMM_23-1 | 16    | 86612574  | G   | T   | FOXL1    | p.R82L     | D-Mis               | D            | 27.7      | .        | .        | .                | .                 | 0.04                      | -0.28                 |
| KMM_21-1 | 8     | 87616341  | C   | G   | CNGB3    | p.G587G    | synonymous          | .            | 4.8       | .        | .        | .                | .                 | 0.00                      | -1.18                 |
| KMM_11-1 | 19    | 15281611  | T   | G   | NOTCH3   | p.N1588H   | D-Mis               | T            | 26.3      | .        | .        | .                | .                 | 0.41                      | 3.53                  |
| KMM_13-3 | 18    | 25589724  | G   | A   | CDH2     | p.S220L    | D-Mis               | T            | 24.8      | 6.60E-05 | .        | 6.10E-05         | 3.23E-05          | 0.99                      | 2.09                  |
| KMM_13-3 | 19    | 59073731  | G   | A   | MZF1     | p.S638L    | D-Mis               | T            | 25.8      | .        | .        | .                | .                 | 0.00                      | -0.26                 |
| KMM_13-3 | 19    | 757502    | G   | C   | MISP     | p.V186L    | T-Mis               | T            | 11.9      | 1.39E-05 | .        | 8.86E-06         | .                 | 0.00                      | -1.17                 |
| KMM_14-1 | 12    | 119937952 | G   | A   | CCDC60   | p.E209E    | synonymous          | .            | 8.2       | .        | .        | .                | .                 | 0.00                      | 0.14                  |
| KMM_16-1 | 2     | 170163857 | T   | A   | LRP2     | p.I121F    | D-Mis               | D            | 21.2      | .        | .        | .                | .                 | 1.00                      | 2.07                  |
| KMM_27-1 | 1     | 68960137  | A   | C   | DEPDC1   | p.V97G     | D-Mis               | T            | 23.3      | .        | .        | .                | .                 | 0.00                      | 0.44                  |
| KMM_27-1 | 12    | 88586534  | T   | C   | TMTC3    | p.F620F    | synonymous          | .            | 11.3      | .        | 7.96E-06 | .                | .                 | 0.00                      | 1.62                  |
| KMM_2-1  | 1     | 186330829 | C   | T   | TPR      | p.D295N    | D-Mis               | T            | 32.0      | .        | .        | .                | .                 | 1.00                      | 2.99                  |
| KMM_2-1  | 19    | 1052268   | G   | A   | ABCA7    | p.S1068N   | T-Mis               | T            | 11.7      | .        | .        | .                | .                 | 0.00                      | -1.47                 |
| KMM_2-1  | 4     | 57180668  | CG  | C   | KIAA1211 | p.R334fs   | frameshift_deletion | .            | .         | .        | .        | .                | .                 | 0.00                      | 0.36                  |
| KMM_35-1 | 17    | 12028609  | A   | C   | MAP2K4   | c.847-2A>C | splicing            | .            | 33.0      | .        | .        | .                | .                 | 1.00                      | 3.23                  |
| KMM_36-1 | 12    | 72030698  | C   | T   | ZFC3H1   | p.E623K    | D-Mis               | T            | 25.9      | .        | .        | .                | .                 | 1.00                      | 2.14                  |
| KMM_39-1 | 5     | 140962861 | T   | C   | DIAPH1   | c.534-2A>G | splicing            | .            | 33.0      | .        | .        | .                | .                 | 0.92                      | 1.65                  |
| KMM_40-1 | 12    | 18552718  | A   | C   | PIK3C2G  | p.H529P    | D-Mis               | T            | 24.2      | .        | .        | .                | .                 | 0.00                      | -0.97                 |
| KMM_40-1 | 8     | 104240298 | C   | G   | BAALC    | p.R172G    | D-Mis               | T            | 20.2      | .        | .        | .                | .                 | 0.00                      | -0.26                 |
| KMM_42-1 | 19    | 33609999  | C   | T   | GPATCH1  | p.R833W    | D-Mis               | T            | 23.4      | 3.50E-05 | 7.96E-06 | 1.64E-05         | .                 | 0.00                      | 0.68                  |
| KMM_42-1 | 5     | 140961905 | A   | G   | DIAPH1   | p.C220R    | D-Mis               | D            | 28.2      | .        | .        | .                | .                 | 0.92                      | 1.65                  |
| KMM_42-1 | 5     | 6742701   | T   | C   | TENT4A   | p.N369N    | synonymous          | .            | 11.0      | .        | .        | .                | .                 | 1.00                      | 2.31                  |
| KMM_50-1 | 10    | 33200833  | G   | A   | ITGB1    | p.S563S    | synonymous          | .            | 11.6      | .        | .        | .                | .                 | 0.98                      | 3.46                  |
| KMM_5-1  | 17    | 71434185  | G   | A   | SDK2     | p.D278D    | synonymous          | .            | 5.3       | .        | 3.19E-05 | 4.00E-05         | 3.23E-05          | 0.00                      | 2.68                  |
| KMM_5-1  | 3     | 151163065 | A   | C   | IGSF10   | p.S1568S   | synonymous          | .            | 0.8       | .        | .        | .                | .                 | 0.00                      | -1.63                 |

---

AA Change - Amino Acid Change; Bravo WGS Freq - Bravo Whole Genome Sequencing Frequency; gnomAD WES Freq - Gnome Aggregation Database Whole Exome Sequence Frequency; MetaSVM - Meta-analytic support vector machine is an ensemble score that predicts the tolerability of a mutation. CADD1.6 - Combined Annotated Dependent Depletion is a validated tool for scoring the deleteriousness of single nucleotide deletions, insertions, or variations. pLI is a gene-wide constraint metric that estimates the probability of being intolerant to loss-of-function mutations. mis\_Z is a gene-wide constraint metric that estimates the probability of being intolerant to missense mutations.

**eTable 6. Demographic characteristics of primary MMD cases and controls**

|                           | Cases      | UTHealth cases | Autism Sibling Controls |
|---------------------------|------------|----------------|-------------------------|
| <b>Sample size</b>        | 24         | 84             | 1,798                   |
| <b>Gender</b>             |            |                |                         |
| Male                      | 14 (58.3%) | 22 (26.2%)     | 842 (46.8%)             |
| Female                    | 10 (41.7%) | 62 (73.8%)     | 956 (53.2%)             |
| <b>Ethnicity</b>          |            |                |                         |
| European                  | 18 (75.0%) | 65 (77.4%)     | 1,418 (78.9%)           |
| African American/African* | 1 (4.2%)   | 5 (5.9%)       | 77 (4.3%)               |
| East Asian                | 1 (4.2%)   | 3 (3.6%)       | 40 (2.2%)               |
| South Asian               | 0 (0.0%)   | 2 (2.4%)       | 88 (4.9%)               |
| Mexican                   | 4 (16.6%)  | 3 (3.6%)       | 129 (7.2%)              |
| Other                     | 0 (0.0%)   | 6 (7.1%)       | 46 (2.6%)               |



---

The number of samples is shown in each category with the corresponding percentage in parentheses. Ethnicity is determined by principal component analysis compared to HapMap samples using EIGENSTRAT. Plink --check-sex was used to determine sex.

**eTable 7 Sequencing metrics for all reported samples**

| ID          | Read Length | Num reads (M) | Num bases (G) | Mean coverage | Median coverage | PCR duplicates | Multiply mapped | Un-mapped | Reads on-target: | Bases on-target | Mean error rate | 1x target base coverage | 2x target base coverage | 4x target base coverage | 8x target base coverage | 10x target base coverage | 15x target base coverage | 20x target base coverage | 30x target base coverage | 40x target base coverage | 50x target base coverage | 100x target base coverage | Targets  |
|-------------|-------------|---------------|---------------|---------------|-----------------|----------------|-----------------|-----------|------------------|-----------------|-----------------|-------------------------|-------------------------|-------------------------|-------------------------|--------------------------|--------------------------|--------------------------|--------------------------|--------------------------|--------------------------|---------------------------|----------|
| CHO_0001-01 | 76          | 65.6          | 5             | 65.9          | 56              | 0.0476         | 0.0648          | 0.0012    | 0.6333           | 0.4752          | 0.0036          | 0.98                    | 0.973                   | 0.96                    | 0.934                   | 0.92                     | 0.882                    | 0.839                    | 0.746                    | 0.65                     | 0.558                    | 0.212                     | V2       |
| CHO_0001-02 | 76          | 84.7          | 6.4           | 83.3          | 71              | 0.0592         | 0.0629          | 0.0013    | 0.6205           | 0.4649          | 0.0039          | 0.981                   | 0.974                   | 0.963                   | 0.943                   | 0.932                    | 0.904                    | 0.872                    | 0.802                    | 0.727                    | 0.651                    | 0.33                      | V2       |
| CHO_0001-03 | 76          | 70.7          | 5.4           | 69            | 58              | 0.0605         | 0.064           | 0.0012    | 0.6155           | 0.4613          | 0.0037          | 0.981                   | 0.973                   | 0.96                    | 0.934                   | 0.92                     | 0.883                    | 0.842                    | 0.753                    | 0.661                    | 0.572                    | 0.236                     | V2       |
| KMM_11-1    | 101         | 57.2          | 5.8           | 67.6          | 65              | 0.1627         | 0.0672          | 0.0022    | 0.6135           | 0.4551          | 0.0019          | 0.987                   | 0.986                   | 0.985                   | 0.984                   | 0.983                    | 0.978                    | 0.969                    | 0.926                    | 0.842                    | 0.72                     | 0.124                     | IDT      |
| KMM_11-2    | 101         | 74.2          | 7.5           | 95.7          | 92              | 0.1065         | 0.0642          | 0.0012    | 0.6646           | 0.4968          | 0.0018          | 0.987                   | 0.986                   | 0.985                   | 0.984                   | 0.983                    | 0.982                    | 0.98                     | 0.97                     | 0.947                    | 0.902                    | 0.414                     | IDT      |
| KMM_11-3    | 101         | 59.6          | 6             | 77.9          | 74              | 0.0957         | 0.0694          | 0.0022    | 0.6759           | 0.5032          | 0.0019          | 0.987                   | 0.986                   | 0.985                   | 0.984                   | 0.983                    | 0.98                     | 0.975                    | 0.951                    | 0.9                      | 0.814                    | 0.215                     | IDT      |
| KMM_13-1    | 101         | 83.9          | 8.5           | 102.1         | 99              | 0.1264         | 0.0615          | 0.0009    | 0.6263           | 0.4684          | 0.0019          | 0.988                   | 0.988                   | 0.987                   | 0.986                   | 0.985                    | 0.984                    | 0.982                    | 0.973                    | 0.952                    | 0.913                    | 0.493                     | IDT      |
| KMM_13-2    | 101         | 54.9          | 5.5           | 62.3          | 60              | 0.169          | 0.0607          | 0.0021    | 0.5863           | 0.4368          | 0.0019          | 0.987                   | 0.986                   | 0.985                   | 0.984                   | 0.983                    | 0.979                    | 0.971                    | 0.925                    | 0.826                    | 0.683                    | 0.066                     | IDT      |
| KMM_13-3    | 101         | 64.5          | 6.5           | 82.7          | 79              | 0.0831         | 0.0662          | 0.0008    | 0.6601           | 0.4938          | 0.0019          | 0.988                   | 0.987                   | 0.986                   | 0.985                   | 0.985                    | 0.982                    | 0.978                    | 0.959                    | 0.914                    | 0.84                     | 0.27                      | IDT      |
| KMM_14-1    | 101         | 47            | 4.7           | 60.3          | 58              | 0.0925         | 0.0671          | 0.0023    | 0.661            | 0.4942          | 0.0018          | 0.988                   | 0.987                   | 0.986                   | 0.984                   | 0.983                    | 0.977                    | 0.964                    | 0.906                    | 0.794                    | 0.64                     | 0.062                     | IDT      |
| KMM_14-2    | 101         | 63.9          | 6.5           | 79.9          | 77              | 0.0923         | 0.0617          | 0.0008    | 0.6456           | 0.4814          | 0.0018          | 0.987                   | 0.987                   | 0.986                   | 0.985                   | 0.984                    | 0.982                    | 0.979                    | 0.963                    | 0.921                    | 0.844                    | 0.227                     | IDT      |
| KMM_14-3    | 101         | 79.5          | 8             | 100.8         | 97              | 0.0997         | 0.0692          | 0.0008    | 0.6533           | 0.4879          | 0.0018          | 0.988                   | 0.987                   | 0.986                   | 0.986                   | 0.985                    | 0.984                    | 0.982                    | 0.973                    | 0.953                    | 0.915                    | 0.47                      | IDT      |
| KMM_16-1    | 101         | 87.9          | 8.9           | 110.8         | 107             | 0.0981         | 0.0663          | 0.0007    | 0.6494           | 0.4856          | 0.0018          | 0.987                   | 0.986                   | 0.985                   | 0.985                   | 0.984                    | 0.983                    | 0.982                    | 0.977                    | 0.966                    | 0.942                    | 0.573                     | IDT      |
| KMM_16-2    | 101         | 91.7          | 9.3           | 115.3         | 111             | 0.0872         | 0.0684          | 0.0006    | 0.646            | 0.4844          | 0.0017          | 0.987                   | 0.987                   | 0.986                   | 0.985                   | 0.985                    | 0.984                    | 0.983                    | 0.978                    | 0.967                    | 0.944                    | 0.603                     | IDT      |
| KMM_16-3    | 101         | 108.6         | 11            | 133.7         | 129             | 0.1019         | 0.0663          | 0.0007    | 0.6335           | 0.4742          | 0.0019          | 0.988                   | 0.988                   | 0.987                   | 0.986                   | 0.986                    | 0.985                    | 0.984                    | 0.981                    | 0.973                    | 0.958                    | 0.721                     | IDT      |
| KMM_19-1    | 101         | 68.8          | 6.9           | 82            | 79              | 0.1392         | 0.0584          | 0.0012    | 0.6201           | 0.4589          | 0.0018          | 0.988                   | 0.987                   | 0.986                   | 0.985                   | 0.984                    | 0.982                    | 0.979                    | 0.962                    | 0.921                    | 0.85                     | 0.261                     | IDT      |
| KMM_19-2    | 101         | 88.8          | 9             | 107.4         | 100             | 0.1524         | 0.064           | 0.0017    | 0.6236           | 0.4658          | 0.0019          | 0.987                   | 0.986                   | 0.985                   | 0.984                   | 0.984                    | 0.982                    | 0.98                     | 0.973                    | 0.955                    | 0.919                    | 0.509                     | IDT      |
| KMM_19-3    | 101         | 33.5          | 3.4           | 39.4          | 38              | 0.1681         | 0.0657          | 0.0058    | 0.6088           | 0.4523          | 0.0018          | 0.987                   | 0.986                   | 0.985                   | 0.98                    | 0.976                    | 0.952                    | 0.902                    | 0.709                    | 0.449                    | 0.232                    | 0.008                     | IDT      |
| KMM_2-1     | 101         | 81.1          | 8.2           | 103.4         | 93              | 0.1275         | 0.0671          | 0.0015    | 0.6555           | 0.4912          | 0.002           | 0.987                   | 0.987                   | 0.986                   | 0.984                   | 0.983                    | 0.981                    | 0.976                    | 0.957                    | 0.92                     | 0.863                    | 0.447                     | IDT      |
| KMM_2-2     | 101         | 120.7         | 12.2          | 146.8         | 141             | 0.1208         | 0.0614          | 0.0008    | 0.6251           | 0.4687          | 0.0019          | 0.987                   | 0.987                   | 0.986                   | 0.985                   | 0.985                    | 0.984                    | 0.983                    | 0.981                    | 0.976                    | 0.966                    | 0.78                      | IDT      |
| KMM_2-3     | 101         | 66.9          | 6.8           | 41.1          | 41              | 0.5255         | 0.0466          | 0.0084    | 0.3296           | 0.2368          | 0.0018          | 0.987                   | 0.986                   | 0.984                   | 0.982                   | 0.979                    | 0.968                    | 0.941                    | 0.802                    | 0.531                    | 0.257                    | 0.002                     | IDT      |
| KMM_21-1    | 76          | 74            | 5.6           | 49.5          | 42              | 0.0883         | 0.0769          | 0.0291    | 0.4954           | 0.4105          | 0.0029          | 0.984                   | 0.981                   | 0.974                   | 0.957                   | 0.947                    | 0.91                     | 0.858                    | 0.712                    | 0.545                    | 0.391                    | 0.056                     | MedExome |

|          |     |       |      |       |     |        |        |        |        |        |        |       |       |       |       |       |       |       |       |       |       |       |          |
|----------|-----|-------|------|-------|-----|--------|--------|--------|--------|--------|--------|-------|-------|-------|-------|-------|-------|-------|-------|-------|-------|-------|----------|
| KMM_21-2 | 76  | 90.5  | 6.9  | 61.7  | 53  | 0.0917 | 0.0756 | 0.0056 | 0.5069 | 0.4195 | 0.0025 | 0.985 | 0.982 | 0.978 | 0.966 | 0.959 | 0.936 | 0.904 | 0.809 | 0.681 | 0.544 | 0.118 | MedExome |
| KMM_21-3 | 76  | 80.5  | 6.1  | 54.9  | 48  | 0.0874 | 0.0817 | 0.0113 | 0.5037 | 0.4183 | 0.003  | 0.986 | 0.984 | 0.979 | 0.969 | 0.962 | 0.938 | 0.901 | 0.786 | 0.63  | 0.47  | 0.07  | MedExome |
| KMM_23-1 | 101 | 49.2  | 5    | 32.6  | 28  | 0.1532 | 0.0678 | 0.1681 | 0.3808 | 0.3057 | 0.0035 | 0.985 | 0.983 | 0.976 | 0.95  | 0.929 | 0.843 | 0.72  | 0.451 | 0.247 | 0.13  | 0.02  | MedExome |
| KMM_23-4 | 101 | 61.6  | 6.2  | 47.7  | 41  | 0.1864 | 0.0644 | 0.0045 | 0.451  | 0.3567 | 0.0039 | 0.986 | 0.984 | 0.981 | 0.97  | 0.962 | 0.931 | 0.879 | 0.715 | 0.521 | 0.35  | 0.044 | MedExome |
| KMM_23-5 | 101 | 55.9  | 5.6  | 37.4  | 32  | 0.1802 | 0.067  | 0.025  | 0.3885 | 0.3081 | 0.0036 | 0.987 | 0.985 | 0.98  | 0.963 | 0.949 | 0.891 | 0.798 | 0.556 | 0.338 | 0.19  | 0.025 | MedExome |
| KMM_27-1 | 101 | 99    | 10   | 123.4 | 117 | 0.092  | 0.0663 | 0.0007 | 0.6389 | 0.4798 | 0.0018 | 0.987 | 0.987 | 0.986 | 0.985 | 0.985 | 0.984 | 0.983 | 0.979 | 0.969 | 0.949 | 0.647 | IDT      |
| KMM_27-2 | 101 | 101.9 | 10.3 | 123.7 | 117 | 0.139  | 0.0674 | 0.0009 | 0.6219 | 0.4674 | 0.0018 | 0.987 | 0.986 | 0.986 | 0.985 | 0.985 | 0.984 | 0.982 | 0.977 | 0.965 | 0.941 | 0.636 | IDT      |
| KMM_27-3 | 101 | 122.8 | 12.4 | 154.5 | 143 | 0.1008 | 0.0668 | 0.0006 | 0.6428 | 0.4849 | 0.0018 | 0.988 | 0.988 | 0.987 | 0.987 | 0.986 | 0.985 | 0.984 | 0.98  | 0.971 | 0.955 | 0.751 | IDT      |
| KMM_28-1 | 101 | 47.5  | 4.8  | 22.4  | 20  | 0.644  | 0.0337 | 0.0146 | 0.2511 | 0.1819 | 0.0019 | 0.984 | 0.982 | 0.978 | 0.95  | 0.916 | 0.759 | 0.542 | 0.211 | 0.079 | 0.031 | 0     | IDT      |
| KMM_28-2 | 101 | 70.8  | 7.2  | 32.7  | 31  | 0.6567 | 0.036  | 0.0071 | 0.2466 | 0.1775 | 0.0019 | 0.984 | 0.983 | 0.981 | 0.976 | 0.972 | 0.942 | 0.864 | 0.554 | 0.253 | 0.101 | 0.002 | IDT      |
| KMM_28-3 | 101 | 80.1  | 8.1  | 89.9  | 81  | 0.2406 | 0.0639 | 0.0017 | 0.5785 | 0.4321 | 0.002  | 0.987 | 0.986 | 0.985 | 0.983 | 0.982 | 0.98  | 0.975 | 0.953 | 0.907 | 0.833 | 0.332 | IDT      |
| KMM_3-1  | 101 | 80.1  | 8.1  | 101.3 | 94  | 0.1295 | 0.0675 | 0.001  | 0.6485 | 0.4869 | 0.0019 | 0.987 | 0.987 | 0.986 | 0.985 | 0.984 | 0.982 | 0.979 | 0.964 | 0.934 | 0.884 | 0.451 | IDT      |
| KMM_3-2  | 101 | 56.3  | 5.7  | 68.2  | 63  | 0.151  | 0.0744 | 0.0027 | 0.625  | 0.466  | 0.0018 | 0.986 | 0.986 | 0.985 | 0.983 | 0.982 | 0.977 | 0.967 | 0.919 | 0.824 | 0.692 | 0.142 | IDT      |
| KMM_3-3  | 101 | 84.9  | 8.6  | 107.9 | 104 | 0.0928 | 0.0644 | 0.0006 | 0.6519 | 0.4892 | 0.0018 | 0.988 | 0.987 | 0.987 | 0.986 | 0.985 | 0.984 | 0.982 | 0.974 | 0.954 | 0.919 | 0.538 | IDT      |
| KMM_35-1 | 101 | 126.7 | 12.8 | 162.2 | 156 | 0.1262 | 0.0688 | 0.0011 | 0.6571 | 0.4934 | 0.0018 | 0.988 | 0.987 | 0.986 | 0.985 | 0.985 | 0.984 | 0.983 | 0.981 | 0.977 | 0.969 | 0.834 | IDT      |
| KMM_35-2 | 101 | 99.5  | 10.1 | 124.3 | 116 | 0.1467 | 0.0683 | 0.001  | 0.6405 | 0.4811 | 0.002  | 0.986 | 0.986 | 0.985 | 0.984 | 0.983 | 0.982 | 0.981 | 0.976 | 0.965 | 0.944 | 0.639 | IDT      |
| KMM_35-3 | 101 | 73.1  | 7.4  | 89.8  | 85  | 0.1909 | 0.0695 | 0.0022 | 0.635  | 0.4728 | 0.0018 | 0.987 | 0.986 | 0.985 | 0.982 | 0.981 | 0.978 | 0.971 | 0.948 | 0.904 | 0.837 | 0.364 | IDT      |
| KMM_36-1 | 101 | 124.5 | 12.6 | 154.2 | 148 | 0.1231 | 0.0642 | 0.0009 | 0.6353 | 0.4773 | 0.0017 | 0.987 | 0.987 | 0.986 | 0.985 | 0.985 | 0.985 | 0.984 | 0.982 | 0.977 | 0.968 | 0.795 | IDT      |
| KMM_36-2 | 101 | 85.7  | 8.7  | 109.6 | 105 | 0.1028 | 0.0674 | 0.0006 | 0.6536 | 0.4924 | 0.0018 | 0.987 | 0.986 | 0.986 | 0.985 | 0.984 | 0.983 | 0.981 | 0.974 | 0.957 | 0.924 | 0.55  | IDT      |
| KMM_36-3 | 101 | 110.8 | 11.2 | 126.5 | 120 | 0.2149 | 0.0588 | 0.0014 | 0.5808 | 0.4398 | 0.0021 | 0.988 | 0.987 | 0.986 | 0.986 | 0.985 | 0.984 | 0.982 | 0.976 | 0.961 | 0.936 | 0.649 | IDT      |
| KMM_39-1 | 101 | 93.2  | 9.4  | 109.1 | 105 | 0.1816 | 0.0614 | 0.0014 | 0.5987 | 0.451  | 0.0022 | 0.988 | 0.987 | 0.987 | 0.986 | 0.985 | 0.984 | 0.982 | 0.973 | 0.955 | 0.92  | 0.55  | IDT      |
| KMM_39-2 | 101 | 78.8  | 8    | 95.7  | 91  | 0.1588 | 0.0647 | 0.0011 | 0.6185 | 0.468  | 0.0021 | 0.987 | 0.986 | 0.985 | 0.984 | 0.984 | 0.982 | 0.979 | 0.966 | 0.935 | 0.882 | 0.418 | IDT      |
| KMM_39-3 | 101 | 97.6  | 9.9  | 115.1 | 102 | 0.2085 | 0.0624 | 0.002  | 0.5983 | 0.454  | 0.0023 | 0.987 | 0.987 | 0.986 | 0.984 | 0.983 | 0.98  | 0.976 | 0.957 | 0.922 | 0.87  | 0.514 | IDT      |
| KMM_40-1 | 101 | 76    | 7.7  | 89.3  | 86  | 0.1748 | 0.0634 | 0.0014 | 0.5988 | 0.4524 | 0.0022 | 0.988 | 0.987 | 0.986 | 0.985 | 0.985 | 0.982 | 0.978 | 0.96  | 0.918 | 0.851 | 0.358 | IDT      |
| KMM_40-2 | 101 | 58.7  | 5.9  | 65.6  | 63  | 0.2311 | 0.0593 | 0.0014 | 0.5747 | 0.43   | 0.0022 | 0.986 | 0.985 | 0.984 | 0.983 | 0.982 | 0.98  | 0.975 | 0.944 | 0.867 | 0.737 | 0.085 | IDT      |

|          |     |       |      |       |     |        |        |        |        |        |        |       |       |       |       |       |       |       |       |       |       |       |          |
|----------|-----|-------|------|-------|-----|--------|--------|--------|--------|--------|--------|-------|-------|-------|-------|-------|-------|-------|-------|-------|-------|-------|----------|
| KMM_40-3 | 101 | 50.1  | 5.1  | 56.7  | 54  | 0.2326 | 0.0619 | 0.0032 | 0.5795 | 0.4358 | 0.0022 | 0.987 | 0.986 | 0.985 | 0.982 | 0.98  | 0.971 | 0.953 | 0.875 | 0.742 | 0.574 | 0.057 | IDT      |
| KMM_41-1 | 101 | 74.3  | 7.5  | 87.2  | 83  | 0.2093 | 0.0599 | 0.0014 | 0.5987 | 0.4516 | 0.0022 | 0.987 | 0.986 | 0.985 | 0.984 | 0.983 | 0.98  | 0.975 | 0.954 | 0.908 | 0.838 | 0.334 | IDT      |
| KMM_41-2 | 101 | 104.9 | 10.6 | 121.6 | 114 | 0.2097 | 0.0586 | 0.0012 | 0.5905 | 0.4466 | 0.0022 | 0.987 | 0.986 | 0.985 | 0.984 | 0.984 | 0.983 | 0.981 | 0.974 | 0.958 | 0.928 | 0.607 | IDT      |
| KMM_41-3 | 101 | 53.4  | 5.4  | 49.2  | 45  | 0.3586 | 0.0508 | 0.0037 | 0.4717 | 0.3545 | 0.0021 | 0.987 | 0.986 | 0.985 | 0.981 | 0.978 | 0.962 | 0.929 | 0.799 | 0.611 | 0.422 | 0.042 | IDT      |
| KMM_42-1 | 101 | 64.5  | 6.5  | 74.5  | 72  | 0.1958 | 0.0596 | 0.0015 | 0.5908 | 0.4448 | 0.0022 | 0.987 | 0.986 | 0.985 | 0.984 | 0.983 | 0.981 | 0.976 | 0.95  | 0.89  | 0.792 | 0.18  | IDT      |
| KMM_42-2 | 101 | 54.3  | 5.5  | 65.4  | 63  | 0.1643 | 0.061  | 0.0012 | 0.6139 | 0.4641 | 0.003  | 0.987 | 0.986 | 0.985 | 0.983 | 0.982 | 0.978 | 0.968 | 0.92  | 0.826 | 0.697 | 0.101 | IDT      |
| KMM_42-3 | 101 | 63.9  | 6.4  | 76.7  | 72  | 0.1877 | 0.0596 | 0.0019 | 0.6107 | 0.4624 | 0.0031 | 0.987 | 0.986 | 0.985 | 0.984 | 0.983 | 0.979 | 0.971 | 0.934 | 0.864 | 0.766 | 0.23  | IDT      |
| KMM_45-1 | 101 | 72.6  | 7.3  | 66.5  | 54  | 0.3904 | 0.0476 | 0.0021 | 0.4705 | 0.3531 | 0.0031 | 0.985 | 0.984 | 0.982 | 0.978 | 0.975 | 0.96  | 0.931 | 0.827 | 0.688 | 0.553 | 0.179 | IDT      |
| KMM_45-2 | 101 | 76.6  | 7.7  | 53.5  | 45  | 0.5107 | 0.0398 | 0.004  | 0.3651 | 0.2688 | 0.0024 | 0.985 | 0.984 | 0.982 | 0.979 | 0.977 | 0.963 | 0.929 | 0.789 | 0.597 | 0.429 | 0.092 | IDT      |
| KMM_45-3 | 101 | 61.2  | 6.2  | 73.5  | 61  | 0.2207 | 0.0596 | 0.0018 | 0.6086 | 0.4621 | 0.0031 | 0.986 | 0.985 | 0.983 | 0.979 | 0.976 | 0.96  | 0.933 | 0.846 | 0.733 | 0.619 | 0.238 | IDT      |
| KMM_5-1  | 101 | 91.7  | 9.3  | 115.1 | 102 | 0.1466 | 0.0656 | 0.0017 | 0.6458 | 0.4831 | 0.0019 | 0.987 | 0.986 | 0.986 | 0.984 | 0.983 | 0.981 | 0.977 | 0.961 | 0.93  | 0.882 | 0.516 | IDT      |
| KMM_5-2  | 101 | 66.2  | 6.7  | 87    | 82  | 0.0996 | 0.0682 | 0.0012 | 0.674  | 0.5058 | 0.0018 | 0.986 | 0.985 | 0.985 | 0.983 | 0.983 | 0.981 | 0.977 | 0.962 | 0.925 | 0.859 | 0.315 | IDT      |
| KMM_5-3  | 101 | 87.6  | 8.9  | 112.5 | 104 | 0.1224 | 0.0629 | 0.001  | 0.6576 | 0.4944 | 0.0019 | 0.987 | 0.987 | 0.986 | 0.985 | 0.984 | 0.982 | 0.979 | 0.968 | 0.943 | 0.901 | 0.533 | IDT      |
| KMM_50-1 | 101 | 61.6  | 6.2  | 51.9  | 50  | 0.4001 | 0.045  | 0.0015 | 0.435  | 0.324  | 0.0029 | 0.986 | 0.985 | 0.984 | 0.982 | 0.981 | 0.973 | 0.953 | 0.861 | 0.701 | 0.512 | 0.021 | IDT      |
| KMM_50-2 | 101 | 66.1  | 6.7  | 78.4  | 73  | 0.1715 | 0.0599 | 0.0012 | 0.6027 | 0.4571 | 0.0031 | 0.987 | 0.986 | 0.985 | 0.984 | 0.983 | 0.979 | 0.971 | 0.931 | 0.857 | 0.759 | 0.256 | IDT      |
| KMM_50-3 | 101 | 56.4  | 5.7  | 60.9  | 57  | 0.232  | 0.0583 | 0.0059 | 0.5525 | 0.4161 | 0.0028 | 0.987 | 0.987 | 0.986 | 0.983 | 0.981 | 0.972 | 0.954 | 0.877 | 0.755 | 0.611 | 0.097 | IDT      |
| KMM-4-1  | 101 | 42.8  | 4.3  | 36    | 30  | 0.1663 | 0.0695 | 0.0089 | 0.4849 | 0.3881 | 0.0028 | 0.985 | 0.983 | 0.977 | 0.957 | 0.939 | 0.87  | 0.766 | 0.519 | 0.31  | 0.174 | 0.025 | MedExome |
| KMM-4-2  | 101 | 47    | 4.7  | 37.2  | 31  | 0.1725 | 0.071  | 0.0236 | 0.458  | 0.3653 | 0.0027 | 0.985 | 0.983 | 0.978 | 0.958 | 0.942 | 0.876 | 0.777 | 0.539 | 0.332 | 0.193 | 0.027 | MedExome |
| KMM-4-3  | 101 | 45.7  | 4.6  | 36.2  | 31  | 0.1939 | 0.0689 | 0.0089 | 0.4588 | 0.3651 | 0.0027 | 0.986 | 0.984 | 0.978 | 0.959 | 0.943 | 0.88  | 0.782 | 0.536 | 0.319 | 0.176 | 0.024 | MedExome |
| KMM_22-1 | 101 | 73    | 7.4  | 81.3  | 77  | 0.1845 | 0.0654 | 0.0014 | 0.572  | 0.4284 | 0.0018 | 0.987 | 0.986 | 0.986 | 0.985 | 0.984 | 0.982 | 0.978 | 0.958 | 0.908 | 0.825 | 0.26  | IDT      |
| KMM_29-1 | 101 | 91.9  | 9.3  | 73.2  | 69  | 0.4197 | 0.0535 | 0.0074 | 0.4169 | 0.3066 | 0.002  | 0.987 | 0.986 | 0.985 | 0.984 | 0.983 | 0.979 | 0.972 | 0.936 | 0.863 | 0.754 | 0.197 | IDT      |

**eTable 8. Rare transmitted/unphased variants in known MMD genes**

**a. Characteristics of four patients with mutations in *ACTA2* and *RNF213***

| Proband ID | Ethnicity | Sex | Type                    | Class | Gene          | Position (GRCh37) | AA Change | Bravo Freq           | Meta SVM | CADD 1.6 | Cons46aa (cons46diffcnt)                              |
|------------|-----------|-----|-------------------------|-------|---------------|-------------------|-----------|----------------------|----------|----------|-------------------------------------------------------|
| KMM_16-1   | European  | F   | Transmitted from Father | D-Mis | <i>ACTA2</i>  | 10:90707044:T:C   | p.I77V    | .                    | D        | 22.1     | /II-II-II/     I-       /I-      (0)                  |
| KMM_36-1   | European  | F   | Transmitted from Mother | D-Mis | <i>RNF213</i> | 17:78293080:T:C   | p.C998R   | 8.0x10 <sup>-6</sup> | T        | 23.8     | C-CC-CCCC/-CC-CC-C/-CCCC---CCC---C-/C----- (0)        |
| KMM_14-1   | European  | M   | Transmitted from Father | D-Mis | <i>RNF213</i> | 17:78357556:T:C   | p.I4717T  | .                    | T        | 21.7     | /LIIIV-I/      -    - VIII LLL- (8)                   |
| KMM_40-1   | European  | M   | Transmitted from Father | D-Mis | <i>RNF213</i> | 17:78359416:C:A   | p.T4845K  | .                    | T        | 22.7     | TT-MTTT-TT/TTT-TT--/-TTTTTTTT-TTTTTTTT/TT-M-T---- (2) |

**b. Phylogenetic conservation of reference amino acid at each variant position described in this work.**

| Species                | <i>ACTA2</i> - p.I77 | <i>RNF213</i> - p.C998 | <i>RNF213</i> - p.I4717 | <i>RNF213</i> - p.T4845 |
|------------------------|----------------------|------------------------|-------------------------|-------------------------|
| <i>H. sapiens</i> :    | YPIEHGIITNWDD        | AKTFEKCIIEAVS          | SNPVAKIIYGDPV           | LRRSLETNGEINL           |
| <i>M. musculus</i> :   | YPIEHGIITNWDD        | SRSFEKCVIEAVS          | SNPVTKIIYGDPA           | LRRSLETNGEIKL           |
| <i>R. norvegicus</i> : | YPIEHGIITNWDD        | ARSIEKCVIEAVS          | SNPVTKIIYGDPA           | LRRSLETNGEIKL           |
| <i>X. laevis</i> :     | YPIEHGIITNWDD        | GKCFEDCAIEAVR          | SNPIVKIVYGDPL           | LRDSVYANSDIKL           |
| <i>C. familiaris</i> : | YPIEHGIITNWDD        | SKCFEKCVVEAVS          | SNPVARIVYKDPT           | LRRSLQTNGEIKL           |
| <i>R. macaque</i> :    | YPIEHGIITNWDD        | AKTFEKCIIEAVS          | SNPVAKIIYGDPV           | LRRSLETNGEINL           |

---

AA Change - Amino Acid Change; Bravo Freq - Bravo Whole Genome Sequencing Frequency; MetaSVM - Meta-analytic support vector machine is an ensemble score that predicts the tolerability of a mutation. CADD1.6 - Combined Annotated Dependent Depletion is a validated tool for scoring the deleteriousness of single nucleotide deletions, insertions, or variations. Cond46aa represents "Residues among 46 vertebrate species" as described before in Furey et. al: reference #46

**eTable 9. De novo variant enrichment analysis for each functional class in 22 primary Moyamoya case trios**

| Primary Moyamoya Cases, N = 22                                                |          |      |          |      |            |      |
|-------------------------------------------------------------------------------|----------|------|----------|------|------------|------|
|                                                                               | Observed |      | Expected |      | Enrichment | p    |
|                                                                               | N        | Rate | N        | Rate |            |      |
| <b>All genes (N=19,347)</b>                                                   |          |      |          |      |            |      |
| Total                                                                         | 24       | 1.09 | 24.4     | 1.11 | 0.99       | 0.56 |
| Syn                                                                           | 7        | 0.32 | 6.9      | 0.31 | 1.01       | 0.54 |
| T-Mis                                                                         | 2        | 0.09 | 5.3      | 0.24 | 0.38       | 0.97 |
| D-Mis                                                                         | 12       | 0.55 | 10.1     | 0.46 | 1.19       | 0.31 |
| LoF                                                                           | 3        | 0.14 | 2.1      | 0.1  | 1.42       | 0.36 |
| Protein altering                                                              | 17       | 0.77 | 17.5     | 0.8  | 0.97       | 0.58 |
| Protein damaging                                                              | 15       | 0.68 | 12.2     | 0.55 | 1.23       | 0.25 |
| <b>High brain-expressed genes (brain expression rank ≥ 75%; N=4,522)</b>      |          |      |          |      |            |      |
| Total                                                                         | 7        | 0.32 | 6.3      | 0.29 | 1.11       | 0.44 |
| Syn                                                                           | 2        | 0.09 | 1.8      | 0.08 | 1.14       | 0.52 |
| T-Mis                                                                         | 2        | 0.09 | 1        | 0.05 | 2          | 0.26 |
| D-Mis                                                                         | 3        | 0.14 | 3        | 0.14 | 0.99       | 0.59 |
| LoF                                                                           | 2        | 0.09 | 0.6      | 0.03 | 3.52       | 0.11 |
| Protein altering                                                              | 5        | 0.23 | 4.5      | 0.2  | 1.1        | 0.47 |
| Protein damaging                                                              | 5        | 0.23 | 3.6      | 0.16 | 1.38       | 0.3  |
| <b>Loss-of-function intolerant genes (gnomADv2.1.1 pLI ≥ 0.9; N=3,049)</b>    |          |      |          |      |            |      |
| Total                                                                         | 9        | 0.41 | 5.8      | 0.26 | 1.54       | 0.14 |
| Syn                                                                           | 2        | 0.09 | 1.6      | 0.07 | 1.21       | 0.49 |
| T-Mis                                                                         | 0        | 0    | 0.8      | 0.04 | 0          | 1    |
| D-Mis                                                                         | 5        | 0.23 | 2.9      | 0.13 | 1.7        | 0.18 |
| LoF                                                                           | 2        | 0.09 | 0.5      | 0.02 | 3.83       | 0.1  |
| Protein altering                                                              | 7        | 0.32 | 4.2      | 0.19 | 1.67       | 0.13 |
| Protein damaging                                                              | 7        | 0.32 | 3.5      | 0.16 | 2.02       | 0.06 |
| <b>Loss-of-function-intolerant &amp; high brain expressed genes (N=1,495)</b> |          |      |          |      |            |      |

|                  |   |      |     |      |      |      |
|------------------|---|------|-----|------|------|------|
| Total            | 5 | 0.23 | 2.8 | 0.13 | 1.79 | 0.15 |
| Syn              | 2 | 0.09 | 0.8 | 0.04 | 2.58 | 0.18 |
| T-Mis            | 0 | 0    | 0.3 | 0.01 | 0    | 1    |
| D-Mis            | 2 | 0.09 | 1.5 | 0.07 | 1.38 | 0.43 |
| LoF              | 1 | 0.05 | 0.3 | 0.01 | 3.88 | 0.23 |
| Protein altering | 3 | 0.14 | 2   | 0.09 | 1.48 | 0.33 |
| Protein damaging | 3 | 0.14 | 1.7 | 0.08 | 1.75 | 0.25 |

N: number of *de novo* variants; Rate: number of *de novo* variants per subject; Enrichment: ratio of observed to expected numbers of *de novo* variants; D-Mis: damaging missense variants as predicted by MetaSVM or CADD v1.6 ( $\geq 20$ ); LoF: loss-of-function variants comprised of premature termination, frameshift or splice site mutation; High brain-expressed genes denote genes in the top quartile of expression in the developing mouse brain; Loss-of-function-intolerant genes denote genes with a pLI  $\geq 0.9$  in the gnomAD database (v2.1.1).



**eTable 10. Damaging recessive variants in 26 MMD cases**

| ID          | Variant Type          | CHROM:POS:REF:ALT                 | Gene           | AA change          | Variant Class                     | MetaSVM | CADD v1.6 | Bravo WGS Freq        | gnomAD WES Freq       | gnomAD WGS Freq       | pLI score (gnomAD v2.1.1) | mis_z (gnomAD v2.1.1) |
|-------------|-----------------------|-----------------------------------|----------------|--------------------|-----------------------------------|---------|-----------|-----------------------|-----------------------|-----------------------|---------------------------|-----------------------|
| KMM-4-1     | Homozygous            | 2:218686643:T:A                   | <i>TNS1</i>    | p.E1027V           | D-Mis                             | D       | 29.1      | 8.28E-04              | 2.00E-03              | 3.60E-03              | 0.06                      | 0.55                  |
| CHO_0001-01 | Homozygous            | 3:1369255:G:C                     | <i>CNTN6</i>   | p.E400Q            | D-Mis                             | T       | 25        | 7.09E-04              | 1.30E-03              | 5.00E-04              | 0.00                      | -3.00                 |
| KMM_13-3    | Homozygous            | 8:121290743:A:G                   | <i>COL14A1</i> | p.K1136R           | D-Mis                             | T       | 21.4      | 8.28E-04              | 1.00E-03              | 7.00E-04              | 0.00                      | 1.54                  |
| CHO_0001-01 | Homozygous            | 15:52539165:G:A                   | <i>MYO5C</i>   | p.T643M            | D-Mis                             | T       | 23.6      | 9.16E-04              | 1.10E-03              | 6.00E-04              | 0.00                      | 0.48                  |
| KMM_3-1     | Homozygous            | 17:14110391:G:A                   | <i>COX10</i>   | p.R398H            | D-Mis                             | D       | 24.9      | 1.35E-04              | 9.83E-05              | .                     | 0.08                      | -0.18                 |
| KMM_13-3    | compound heterozygous | 17:48264049:C:T/17:48276622:G:T   | <i>COL1A1</i>  | p.A1256T/p.P146T   | D-Mis/D-Mis                       | D/D     | 26/20.1   | 2.31E-04/<br>3.98E-05 | 2.00E-04/<br>9.78E-06 | 6.47E-05/.            | 1.00                      | 3.53                  |
| KMM_13-3    | compound heterozygous | 3:89259601:G:A/3:89456470:C:T     | <i>EPHA3</i>   | p.E249K/p.A549V    | D-Mis/D-Mis                       | T/T     | 24.7/20.5 | 7.96E-06/<br>1.04E-04 | 1.67E-05/<br>2.00E-04 | ./6.47E-05            | 0.00                      | 0.65                  |
| KMM_13-3    | compound heterozygous | 2:168097184:T:C/2:168100235:C:T   | <i>XIRP2</i>   | p.L360P/p.P778L    | D-Mis/D-Mis                       | D/T     | 24.2/26.4 | 1.59E-05/<br>2.39E-05 | 4.06E-06/0            | ./3.23E-05            | 0.00                      | -2.40                 |
| KMM_14-1    | compound heterozygous | 2:179479288:A:G/2:179647563:C:T   | <i>TTN</i>     | p.I16318T/p.V1024I | D-Mis/D-Mis                       | D/T     | 21.8/20.7 | 9.64E-04/<br>2.39E-05 | 1.20E-03/<br>2.48E-05 | 1.20E-03/<br>3.67E-05 | 0.00                      | -1.10                 |
| KMM_21-1    | compound heterozygous | 17:10301792:T:C/17:10323469:G:A   | <i>MYH8</i>    | p.I1383V/p.R26W    | D-Mis/D-Mis                       | T/D     | 22.5/23.9 | 3.74E-04/<br>7.96E-06 | 6.00E-04/<br>8.13E-06 | 4.00E-04/.            | 0.00                      | 0.35                  |
| KMM_35-1    | compound heterozygous | 7:122028773:C:T/7:122076416:GT:G  | <i>CADPS2</i>  | p.E856K/p.T671fs   | D-<br>Mis/frameshift<br>-deletion | T/.     | 32/.      | 7.88E-04/<br>1.35E-04 | 1.50E-03/<br>2.00E-04 | 3.00E-04/<br>3.24E-05 | 0.37                      | 1.09                  |
| KMM_36-1    | compound heterozygous | 1:22155342:C:T/1:22198756:G:A     | <i>HSPG2</i>   | p.G4075S/p.L1382F  | D-Mis/D-Mis                       | D/D     | 26.2/27   | 1.59E-05/<br>7.96E-06 | 2.02E-05/<br>1.94E-05 | 3.24E-05/.            | 0.00                      | 1.14                  |
| KMM_40-1    | compound heterozygous | 16:67985888:C:T/16:68002521:C:T   | <i>SLC12A4</i> | p.A324T/p.G13R     | D-Mis/D-Mis                       | T/T     | 20.4/22.9 | ./4.14E-04            | ./6.00E-04            | ./3.00E-04            | 0.00                      | 1.35                  |
| KMM_42-1    | compound heterozygous | 14:100595081:A:G/14:100604139:G:A | <i>EVL</i>     | p.Q238R/p.R365K    | D-Mis/D-Mis                       | T/T     | 21.3/35   | 7.96E-06/.            | ./.                   | ./3.23E-05            | 1.00                      | 1.48                  |
| KMM_42-1    | compound heterozygous | 16:68912084:A:G/16:69008053:C:T   | <i>TANGO6</i>  | p.T399A/p.R942X    | D-Mis/stopgain                    | T/.     | 22.1/40   | 4.78E-05/<br>3.19E-05 | 4.89E-05/<br>1.63E-05 | ./3.23E-05            | 0.00                      | 0.45                  |
| KMM_42-1    | compound heterozygous | 6:31733817:T:C/6:31743113:G:A     | <i>VWA7</i>    | p.N781S/p.Q203X    | D-Mis/stopgain                    | T/.     | 25.4/36   | 7.96E-06/<br>7.96E-06 | ./4.18E-06            | 3.23E-05/.            | 0.00                      | 1.01                  |
| KMM_45-1    | compound heterozygous | 3:142259830:T:G/3:142261533:T:C   | <i>ATR</i>     | p.H1166P/p.S1142G  | D-Mis/D-Mis                       | T/T     | 26.1/21.9 | 1.59E-05/<br>7.88E-04 | 4.47E-05/<br>6.00E-04 | ./4.00E-04            | 0.00                      | 4.36                  |
| KMM_50-1    | compound heterozygous | 2:26667804:C:T/2:26673482:A:G     | <i>DRC1</i>    | p.L462F/p.D541G    | D-Mis/D-Mis                       | T/T     | 23/29.6   | ./7.96E-05            | 8.25E-06/<br>1.00E-04 | ./.                   | 0.00                      | -0.05                 |
| KMM_50-1    | compound heterozygous | 2:241658469:G:A/2:241702220:T:C   | <i>KIF1A</i>   | p.A1640V/p.S703G   | D-Mis/D-Mis                       | T/T     | 24.3/23.1 | 2.87E-04/.            | 3.00E-04/.            | 4.00E-04/.            | 1.00                      | 5.16                  |
| KMM_50-1    | compound heterozygous | 16:3452194:C:T/16:3454579:C:T     | <i>ZNF174</i>  | p.L64F/p.R186W     | D-Mis/D-Mis                       | T/T     | 23.7/21.2 | ./3.19E-05            | ./1.65E-05            | ./.                   | 0.01                      | 0.56                  |

---

AA Change - Amino Acid Change; Bravo WGS Freq - Bravo Whole Genome Sequencing Frequency; gnomAD WES Freq - Gnome Aggregation Database Whole Exome Sequence Frequency; MetaSVM - Meta-analytic support vector machine is an ensemble score that predicts the tolerability of a mutation. CADD1.6 - Combined Annotated Dependent Depletion is a validated tool for scoring the deleteriousness of single nucleotide deletions, insertions, or variations. pLI is a gene-wide constraint metric that estimates the probability of being intolerant to loss-of-function mutations. mis\_Z is a gene-wide constraint metric that estimates the probability of being intolerant to missense mutations.

## **eMethods. Detailed Methods**

### **Kinship analysis**

Relationship between proband and parents was estimated using the pairwise identity-by-descent (IBD) calculation in PLINK <sup>60</sup>. The IBD sharing between the proband and parents in all trios is between 45% and 55%.

### **Ruling out duplicated samples**

To identify subjects who could have been recruited multiple times in case cohorts, control cohorts, or both, we calculated the overlap of high-confidence rare variants (MAF = 0% in ExAC, gnomAD, and Bravo) between each pair of individuals. For pairs that share  $\geq 80\%$  of rare variants, the sample with greater sequence coverage was kept in the analysis and the other discarded.

### **Principal component analysis**

To determine the genetic ancestry of each subject, we used the EIGENSTRAT software <sup>1</sup> to analyze tag single-nucleotide polymorphisms (SNPs) in cases, controls, and HapMap subjects as described <sup>2</sup>.

### ***De novo* variant expectation model**

Because the MMD trios were captured by three different reagents (i.e., Nimblegen V2, MedExome, and IDT), we took the union of all bases covered by different capture reagents and generated a Browser Extensible Data (BED) file representing a unified capture for all trios. We used bedtools (v2.27.1) to extract sequences from the BED file<sup>3</sup>. A total of 1,798 control trios consisting of unaffected siblings and parents of patients with autism spectrum disorder from the Simons Simplex Collection were analyzed in parallel<sup>4</sup>. We then applied a sequence context-based method to calculate the probability of observing a DNV for each base in the coding region, adjusting for sequencing depth in each gene as described previously<sup>5</sup>. Briefly, for each base in the exome, the probability of observing every tri-nucleotide mutating to other tri-nucleotide was determined. ANNOVAR (v2015Mar22) was used to annotate the consequence of each possible substitution. RefSeq was used to annotate variants (based on the file “hg19\_refGene.txt” provided by ANNOVAR). For each gene, the coding consequence of each potential substitution was summed for each functional class (synonymous, missense, canonical splice site, frameshift insertions/deletions, stop-gain, stop-loss, start-lost) to determine the gene-specific variant probabilities<sup>5</sup>. The probability of a frameshift mutation was determined by multiplying the probability of a stop-gain mutation by 1.25, as described previously<sup>5</sup>. In-frame insertions or deletions are not accounted for by the model and were not considered in the downstream statistical analyses. To align with ANNOVAR annotations, analysis was limited to variants that were located in the exonic or canonical splice site regions and were not annotated as “unknown” by ANNOVAR. Following the inclusion criteria, we identified potential coding mutations and generated gene-specific mutation probabilities for 19,347 unique genes. Owing to differences in the exome capture kits, DNA sequencing platforms, and variable sequencing

coverage used to study case and control cohorts, respectively, separate *de novo* probability tables were generated for cases and controls.

### ***De novo* mutation enrichment analysis**

The burden of DNVs in MMD cases was determined using the denovolyzeR package as previously described <sup>2</sup>. Briefly, the expected number of DNVs in the case cohort across each functional class was calculated by taking the sum of each functional class-specific probability multiplied by the number of probands in the study x 2 (diploid genomes). Then, the expected number of DNVs across functional classes was compared to the observed number in each study using a Poisson test <sup>5</sup>. Gene-set enrichment analyses only considered variants observed or expected in genes within the specified gene set (i.e., high brain-expressed, LoF-intolerant).

### **Prediction of variant impact on mDia1 structure**

The mDia1 protein sequence (UniProt O60610) was used to query the Protein DataBank for structural homologs using MolSoft ICM-Pro ver 1.8.7c <sup>7</sup>. The search identified two structures of mDia1 from mouse (PDB id 2BNX<sup>76</sup> and 1V9D<sup>77</sup>). The homology model was built in ICM-Pro based on a 96.1% sequence identity with the mouse template over the resolved residues of mouse mDia1 separately. The  $\Delta\Delta G$  value was calculated using the Molmechanics tool of ICM-Pro and used to predict the impact of the variant on protein structure <sup>8</sup>; this is mathematically expressed by the equation:

$$\Delta G = \Delta G_{\text{misfolded}} - \Delta G_{\text{unfolded}}$$

In this equation,  $\Delta G_{\text{unfolded}}$  refers to the sum of the energies attributed to the individual residues before the mutation, while  $\Delta G_{\text{misfolded}}$  refers to the sum of the energies attributed to the individual residues after the mutation. A positive  $\Delta\Delta G$  indicates a destabilization effect on protein structure caused by the point mutation. More detailed information can be found in **eFigure 2**.

## eReferences

- 1) Price AL, Patterson NJ, Plenge RM, Weinblatt ME, Shadick NA, Reich D. Principal components analysis corrects for stratification in genome-wide association studies. *Nature genetics*. 2006;38(8):904-909.
- 2) Jin SC, Homsy J, Zaidi S, et al. Contribution of rare inherited and de novo variants in 2,871 congenital heart disease probands. *Nature genetics*. 2017;49(11):1593-1601.
- 3) Quinlan AR, Hall IM. BEDTools: a flexible suite of utilities for comparing genomic features. *Bioinformatics*. 2010;26(6):841-842.
- 4) Krumm N, Turner TN, Baker C, et al. Excess of rare, inherited truncating mutations in autism. *Nature genetics*. 2015;47(6):582-588.
- 5) Samocha KE, Robinson EB, Sanders SJ, et al. A framework for the interpretation of de novo mutation in human disease. *Nature genetics*. 2014;46(9):944-950.
- 6) Ware JS, Samocha KE, Homsy J, Daly MJ. Interpreting de novo Variation in Human Disease Using denovolyzeR. *Current protocols in human genetics / editorial board, Jonathan L Haines [et al]*. 2015;87:7 25 21-15
- 7) Abagyan R, Totrov M, Kuznetsov D. Icm - a New Method for Protein Modeling and Design - Applications to Docking and Structure Prediction from the Distorted Native Conformation. *J Comput Chem*. 1994;15(5):488-506.
- 8) Otomo T, Otomo C, Tomchick DR, Machius M, Rosen MK. Structural basis of Rho GTPase-mediated activation of the formin mDia1. *Mol Cell*. 2005;18(3):273-281.
